1 Proofreading-deficient coronaviruses adapt over long-term passage for increased fidelity and  
2 fitness without reversion of exoribonuclease-inactivating mutations

3

4

5 Kevin W. Graepel,<sup>a,b,c</sup> Xiaotao Lu,<sup>b,c</sup> James Brett Case,<sup>a,b,c</sup> Nicole R. Sexton,<sup>a,b,c</sup> Everett Clinton  
6 Smith,<sup>b,c,d</sup># Mark R. Denison,<sup>a,b,c</sup>#

7 Departments of Pathology, Microbiology and Immunology<sup>a</sup> and Pediatrics<sup>b</sup>, and Elizabeth B.

8 Lamb Center for Pediatric Research<sup>c</sup>, Vanderbilt University Medical Center, Nashville,

9 Tennessee, USA; Department of Biology, The University of the South, Sewanee, Tennessee,

10 USA<sup>d</sup>

11

12

13 Running Head: Adaptation of proofreading-deficient coronaviruses

14

15

16 #Address correspondence to Mark Denison, [mark.denison@vanderbilt.edu](mailto:mark.denison@vanderbilt.edu), or Clint Smith,

17 [ecsmith@sewanee.edu](mailto:ecsmith@sewanee.edu)

18

19 Abstract word count: 219

20 Text word count: 5,739

21

22 **ABSTRACT**

23 The coronavirus (CoV) RNA genome is the largest among single-stranded positive sense RNA  
24 viruses. CoVs encode a proofreading 3'→5' exoribonuclease within nonstructural protein 14  
25 (nsp14-ExoN) that is responsible for CoV high-fidelity replication. Alanine substitution of ExoN  
26 catalytic residues [ExoN(-)] in SARS-CoV and murine hepatitis virus (MHV) disrupts ExoN  
27 activity, yielding viable mutant viruses with defective replication, up to 20-fold decreased  
28 fidelity, and increased susceptibility to nucleoside analogs. To test the stability of the ExoN(-)  
29 genotype and phenotype, we passaged MHV-ExoN(-) 250 times in cultured cells (P250), in  
30 parallel with WT-MHV. Compared to MHV-ExoN(-) P3, MHV-ExoN(-) P250 demonstrated  
31 enhanced replication, reduced susceptibility to nucleoside analogs, and increased competitive  
32 fitness. However, passage did not select for complete or partial reversion at the ExoN-  
33 inactivating mutations. We identified novel amino acid changes within the RNA-dependent RNA  
34 polymerase (nsp12-RdRp) and nsp14 of MHV-ExoN(-) P250 that partially account for the  
35 observed changes in replication, susceptibility to nucleoside analogs, and competitive fitness  
36 observed in the passaged virus population, indicating that additional determinants can  
37 compensate for the activities of nsp14-ExoN. Our results suggest that while selection favors  
38 restoration of replication fidelity in ExoN(-) CoVs, there may be a significant barrier to ExoN(-)  
39 reversion. These results also support the hypothesis that high-fidelity replication is linked to CoV  
40 fitness and identify additional candidate proteins that may regulate CoV replication fidelity.

41

42

43 **IMPORTANCE**

44 Unique among RNA viruses, CoVs encode a proofreading exoribonuclease (ExoN) in nsp14 that  
45 mediates high-fidelity RNA genome replication. Proofreading-deficient CoVs with disrupted  
46 ExoN activity [ExoN(-)] are either non-viable or have significant defects in replication, RNA  
47 synthesis, fidelity, fitness, and virulence. In this study, we show that ExoN(-) murine hepatitis  
48 virus can adapt over long-term passage for increased replication and fitness without reverting the  
49 ExoN-inactivating mutations. Passage-adapted ExoN(-) mutants also demonstrate increasing  
50 resistance to nucleoside analogs that is only partially explained by secondary mutations in nsp12  
51 and nsp14. These data suggest that enhanced resistance to nucleoside analogs is mediated by the  
52 interplay of multiple replicase proteins and support the proposed link between CoV fidelity and  
53 fitness.

54

## 55 INTRODUCTION

56 A paradigm of RNA virus biology is error-prone genomic replication due to the lack of  
57 proofreading or post-replicative RNA repair mechanisms (1-3). Decreased replication fidelity  
58 may constrain RNA genome size and complexity and risks the accumulation of deleterious  
59 mutations leading to population extinction, a process known as lethal mutagenesis (4-7). While  
60 genetic diversity allows viral populations to adapt rapidly under selective pressure, many  
61 mutations are neutral or detrimental to viral fitness (8-12). Research performed with many RNA  
62 viruses supports the hypothesis that the mutation rate of RNA virus replicases has evolved to  
63 balance multiple characteristics of the viral population such as genetic diversity, genomic  
64 integrity, and virulence. High- or low-fidelity variants are described for many RNA viruses  
65 infecting animals including the coronaviruses (CoVs): murine hepatitis virus (MHV-A59) and  
66 Severe Acute Respiratory Syndrome-associated coronavirus (SARS-CoV) (13-17), as well as  
67 foot-and-mouth disease virus {Arias:2008bp, Zeng:2013dg, Zeng:2014dj, Xie:2014cs,  
68 Sierra:2007dg}, poliovirus (23-29), chikungunya virus (30, 31), influenza virus (32),  
69 coxsackievirus B3 (33, 34), and human enterovirus 71 (35-37). Most altered-fidelity variants  
70 described to date harbor mutations within the viral RNA-dependent RNA polymerase (RdRp),  
71 are attenuated *in vivo*, and protect against reinfection, highlighting their potential utility as live-  
72 attenuated vaccines (24, 28, 29, 38, 39). These studies underscore the importance of  
73 understanding the molecular mechanisms by which RNA viruses regulate their replication  
74 fidelity.

75 Viruses in the family *Coronaviridae* have large single-stranded positive-sense RNA  
76 genomes [(+)ssRNA] (40), ranging between 25.4 and 33.5 kilobases in length (41, 42). CoVs  
77 encode a 3'→5' exoribonuclease (ExoN) in the N-terminal half of nonstructural protein 14

78 (nsp14-ExoN) (43, 44). CoV ExoN activity requires the presence of conserved magnesium-  
79 coordinating acidic amino acids in three motifs that together constitute the active site (DE-E-D)  
80 (45). The CoV ExoN is grouped with the DE-D-Dh superfamily of exonucleases involved in  
81 proofreading during prokaryotic and eukaryotic DNA replication (Fig. 1) (43-47). Alanine  
82 substitution of CoV motif I DE residues (DE→AA) reduces biochemical ExoN activity in  
83 SARS-CoV (45, 47) and human coronavirus 229E (43). MHV-A59 and SARS-CoV lacking  
84 ExoN activity [ExoN(-)] have mutation frequencies 8-to-20-fold greater than WT viruses (13, 14,  
85 38). Thus, all available data to date support the hypothesis that nsp14-ExoN is the first known  
86 proofreading enzyme encoded by an RNA virus.

87         Despite the critical role of ExoN in virus replication, fidelity, fitness, and virulence,  
88 ExoN(-) mutants have not reverted the inactivating substitutions (GAT→GCA – D89A;  
89 GAA→GCT – E91A) (Fig. 1) (13, 14, 16, 17, 38). In fact, ExoN-inactivating mutations have  
90 been retained during up to 20 passages in culture, eight acute passages of SARS-CoV-ExoN(-) in  
91 aged BALB/c mice, and 60 days of persistent SARS-CoV-ExoN(-) infection in immunodeficient  
92 Rag-/- mice. In this study, we sought to determine whether long-term passage of MHV-A59-  
93 ExoN(-) (250 passages over one year; P250), hereafter MHV-ExoN(-), would result in virus  
94 extinction, ExoN(-) reversion, or compensation for the loss of proofreading. We demonstrate that  
95 MHV-ExoN(-) did not extinguish during the 250 passages and adapted in a gradual, continuous  
96 process for increased replication. MHV-ExoN(-) concurrently evolved reduced susceptibility to  
97 nucleoside and base analogs without reversion of the ExoN-inactivating mutations. The evolved  
98 mutations in MHV-ExoN(-) nsp14 and nsp12, which encodes the RdRp, accounted for only part  
99 of the increased replication and nucleoside analog resistance of MHV-ExoN(-) P250. This study  
100 demonstrates a surprising stability of the ExoN-inactivating substitutions, suggests that CoVs can

101 evolve to compensate for the loss of ExoN functions, and indicates that proteins or other  
102 determinants outside of nsp12 and nsp14 likely contribute to CoV fidelity regulation.  
103

104 **RESULTS**

105 **Long-term passage of MHV-ExoN(-).** We serially passaged WT-MHV and MHV-ExoN(-) in  
106 delayed brain tumor (DBT) cells 250 times (P250). Virus from each passage was harvested once  
107 50-100% of the monolayer was involved in syncytia, which occurred between 8 and 24 hours  
108 post-infection. Passage conditions varied for WT-MHV and MHV-ExoN(-) due to differences in  
109 replication kinetics between the two viruses. We stopped passage at P250 after observing  
110 reduced syncytia formation in MHV-ExoN(-)-infected flasks, likely resulting from a mutation in  
111 the MHV-ExoN(-) P250 spike protein cleavage site (discussed below).

112

113 **MHV-ExoN(-) and WT-MHV replicate with identical kinetics following 250 passages.**

114 MHV-ExoN(-) has a significant replication defect relative to WT-MHV (14). We first tested  
115 whether replication of MHV-ExoN(-) P250 was affected by long-term passage. MHV-ExoN(-)  
116 P3 replication was delayed by ~2 hours and peak titer reduced by ~1 log<sub>10</sub> relative to WT-MHV  
117 P3 during high MOI infection (1 PFU/cell) (Fig. 2A, solid lines), consistent with our previous  
118 studies (14). By P250, both viruses replicated with identical kinetics (Fig. 2A, dotted lines). This  
119 represented a ~1 log<sub>10</sub> increase in peak replication for WT-MHV and a ~2 log<sub>10</sub> increase for  
120 MHV-ExoN(-), compared with the respective parental virus. Further, MHV-ExoN(-) P250 titers  
121 were maintained throughout the experiment, while WT-MHV P250 titers gradually decreased  
122 after 12 hours. We next performed infection at low MOI (0.01 PFU/cell) to examine replication  
123 over multiple cycles. Much like at MOI=1, WT-MHV P250 and MHV-ExoN(-) P250 replicated  
124 identically during multi-cycle infection, reaching peak titer around 28 hours post-infection (Fig.  
125 2B). We also tested replication of MHV-ExoN(-) at P10, P50, P100, and P160. Replication  
126 kinetics gradually increased over passage, reaching P250-like levels by P100 (Fig. 2B). To

127 determine whether the increased replication of MHV-ExoN(-) P250 was affected by the presence  
128 of potential defective viral genomes or by some other population-based phenomenon, both WT-  
129 MHV P250 and MHV-ExoN(-) P250 were plaque purified three times. The plaque-purified  
130 viruses replicated indistinguishably from the parent populations (Fig. 2C). Together, these data  
131 demonstrate that WT-MHV and MHV-ExoN(-) populations adapted for increased replication and  
132 that either individual genomes or those derived from a single virus plaque encoded the adaptive  
133 changes required by the total population.

134

135 **MHV-ExoN(-) accumulated 8-fold more mutations than WT-MHV but did not revert**  
136 **ExoN-inactivating mutations.** To determine whether primary reversion of nsp14-ExoN(-)  
137 resulted in enhanced replication of MHV-ExoN(-) P250, we sequenced nsp14 from infected-cell  
138 total RNA. MHV-ExoN(-) P250 retained the motif I DE→AA substitutions, and we did not  
139 detect any variation in motif I at the level of di-deoxy sequencing at any passage, demonstrating  
140 that phenotypic changes were not the result of primary reversion of ExoN(-) motif I. To identify  
141 potentially adaptive consensus mutations, we performed full-genome di-deoxy sequencing of  
142 MHV-ExoN(-) P250 and WT-MHV P250. Within WT-MHV P250, we identified 23 mutations,  
143 of which 17 were nonsynonymous (NS) (Fig. 3A). In contrast, MHV-ExoN(-) P250 had 171 total  
144 mutations (74 NS) (Fig. 3B). The full-genome sequences have been deposited in GenBank, and  
145 the mutations for both viruses are listed in Supplemental Tables 1 and 2. We identified only one  
146 mutation shared by both viruses (nsp1 A146T), though it was present in approximately 50% of  
147 the WT-MHV P250 population by di-deoxy sequencing. Both viruses deleted most of the  
148 hemagglutinin esterase (HE). In MHV-A59, HE mRNA is not transcribed *in vitro* (48-50), and  
149 HE protein expression is detrimental to MHV-A59 fitness in cell culture (51). WT-MHV P250



150 also deleted ORF 4a, which is dispensable for MHV replication in cell culture (52). The C-  
151 terminal region of ns2 within MHV-ExoN(-) P250 was truncated and fused to HE with a -1  
152 frameshift. Ns2 is a phosphodiesterase (PDE) that protects viral RNA by degrading 2'→5'  
153 oligoadenylate, the activating factor for cellular RNase L (53-55). The portion of ns2 deleted in  
154 MHV-ExoN(-) P250 lies outside the PDE catalytic domain, in a region of unknown function. C-  
155 terminally truncated ns2 retains enzymatic activity (56), but whether this specific deletion and  
156 fusion disrupts PDE activity remains to be tested. Nevertheless, ns2 is dispensable for MHV  
157 replication in immortalized cells (57, 58). Details about the deletion sites are provided in  
158 Supplemental Figure 1. Within proteins predicted to be part of the replicase-transcriptase  
159 complex (nsp7-16 and nucleocapsid) (39), WT-MHV P250 had only one NS change, located in  
160 the nsp13-helicase (Fig. 3A). In contrast, MHV-ExoN(-) P250 had 17 NS changes within this  
161 region (Fig. 3B and Supplemental Tables 1, 2).

162

163 **MHV-ExoN(-) P250 displays increased genomic RNA accumulation and increased**  
164 **resistance to 5-fluorouracil.** Coronaviruses lacking ExoN consistently display defects in RNA  
165 synthesis relative to WT (14, 16, 43). To determine whether the increased replication of MHV-  
166 ExoN(-) P250 was associated with restored genomic RNA (gRNA) production, we measured  
167 gRNA accumulation over time using two-step real-time quantitative PCR (15, 16). MHV-ExoN(-)  
168 ) P250 accumulated similar levels of gRNA to WT-MHV P3 and WT-MHV P250 at early time  
169 points, while gRNA levels for MHV-ExoN(-) P3 were ~1 log<sub>10</sub> lower (Fig. 4A). MHV-ExoN(-)  
170 P250 gRNA levels fell below those of WT-MHV and WT-MHV P250 after 8 hours and were  
171 similar to those of MHV-ExoN(-) P3 at 10 hours post-infection. Normalizing to the gRNA  
172 abundance at four hours for each virus demonstrated that the rates of gRNA accumulation were

173 similar for all four viruses (Fig. 4B). These data suggest that the increased replication of P250  
174 viruses relative to WT-MHV is not fully accounted for by increased RNA synthesis. In addition  
175 to RNA synthesis defects, ExoN(-) CoVs have up-to 20-fold increased mutation frequencies and  
176 profoundly increased sensitivity to nucleoside and base analogs relative to WT CoVs (13, 14, 16,  
177 17, 38). To determine whether nucleoside analog sensitivity of MHV-ExoN(-) was altered by  
178 long-term passage, we treated cells infected with parental and passaged viruses with the base  
179 analog, 5-fluorouracil (5-FU). 5-FU is converted intracellularly into a nucleoside analog that  
180 incorporates into growing RNA strands and causes A:G and U:C mutations. For simplicity, we  
181 hereafter refer to 5-FU as a nucleoside analog. Incorporation of 5-FU is increased in the absence  
182 of ExoN activity (16). All viruses displayed a concentration-dependent decrease in viral titer but  
183 differed greatly in their susceptibility to 5-FU (Fig. 4C). At 120 $\mu$ M, WT-MHV P3 titers were  
184 reduced by  $\sim 1$  log<sub>10</sub>, while MHV-ExoN(-) P3 titers were undetectable ( $> 5$  log<sub>10</sub>-fold reduction).  
185 WT-MHV 5-FU sensitivity was not altered by passage. MHV-ExoN(-) P250 was less susceptible  
186 than MHV-ExoN(-) P3 to 5-FU treatment, with only a  $\sim 1.5$  log<sub>10</sub> decrease in titer at 120  $\mu$ M.  
187 MHV-ExoN(-) P250 remained more sensitive to 5-FU than WT-MHV, suggesting that WT-like  
188 resistance requires an intact ExoN. These data demonstrate that MHV-ExoN(-) P3 evolved  
189 resistance to 5-FU through mutations outside of ExoN(-) motif I.

190

191 **Spike mutations in MHV-ExoN(-) P250 do not increase resistance to 5-FU.** Bacteriophage  
192  $\phi$ X174 acquired resistance to 5-FU by delaying cell lysis, thereby reducing the number of  
193 replication cycles in which 5-FU can be incorporated (59). MHV-ExoN(-) P250 had multiple  
194 mutations in the spike glycoprotein, including one in the spike furin cleavage site that reduced  
195 syncytia formation. To test whether the spike mutations manifested in resistance to 5-FU, we

196 cloned the spike gene from MHV-ExoN(-) P250 into the isogenic MHV-ExoN(-) background.  
197 The recombinant virus demonstrated intermediate replication kinetics between MHV-ExoN(-) P3  
198 and MHV-ExoN(-) P250 (Fig. 5A) and did not form syncytia. Spike-P250 also increased the  
199 specific infectivity of viral particles (Fig. 5B). However, the MHV-ExoN(-) P250 spike did not  
200 affect sensitivity of the recombinant virus to 5-FU (Fig. 5C). Thus, any adaptive increase in 5-FU  
201 resistance must be located elsewhere in the genome.

202

203 **MHV-ExoN(-) passage resulted in unique mutations in nsp12 and nsp14.** To date, three  
204 proteins have been shown to alter CoV sensitivity to 5-FU: the nsp12-RdRp, nsp14-ExoN, and  
205 nsp10, which stimulates ExoN activity (15, 17, 39). Neither WT-MHV nor MHV-ExoN(-) P250  
206 contained a NS mutation in nsp10, and WT-MHV P250 had no mutations within either nsp12 or  
207 nsp14. In contrast, MHV-ExoN(-) P250 had 7 NS mutations in nsp12 and 6 NS mutations in  
208 nsp14 (Figs. 3, 6), none of which have been described previously *in vitro* or in viable viruses.  
209 Within nsp12, six mutations were in the predicted RdRp fingers, palm, and thumb domains (Fig.  
210 6A) (60). Four residues (H709, F766, S776, and M814) can be visualized on a Phyre<sup>2</sup>-modeled  
211 structure of the MHV-nsp12 RdRp, while the remainder lie outside the modeled core RdRp (Fig.  
212 6A) (17). One mutation, M288T, lies in the CoV-specific domain, which is conserved among  
213 nidoviruses. This domain has been implicated in membrane targeting in MHV-A59 (61) and  
214 performs an essential nucleotidyltransferase activity in the arterivirus, equine arteritis virus (62).  
215 However, M288T is not predicted to catalyze nucleotidyltransferase. Within nsp14, 4 NS mutations  
216 were identified in the ExoN domain, and 2 NS mutations were in the C-terminal N7-  
217 methyltransferase domain (Fig. 6B). We next modeled the structure of MHV nsp14 using Phyre<sup>2</sup>  
218 software (63), resulting in highest-probability similarity to the SARS-CoV nsp14-nsp10 complex

219 (PDB: 5C8S) (45) with high-confidence (i.e. the calculated probability of true homology  
220 between the structures) of 100% for residues 3-519 of MHV-nsp14. The model predicts that five  
221 mutations are located close to surface of the protein (Fig. 6B). All three modeled zinc finger  
222 domains contain one NS mutation (F216Y, Y248H, L473I). Two mutations, D128E and F216Y,  
223 are located near the interface between nsp10 and nsp14, though neither site has previously been  
224 implicated in nsp10-nsp14 interaction (15, 64, 65). One NS mutation resulted in a D272E  
225 substitution in ExoN motif III, a metal-coordinating active site residue. We previously reported  
226 that alanine substitution of D272 results in an ExoN(-) phenotype (14), but the viability or  
227 phenotype of a D272E substitution was not tested in that study. These data suggest that a  
228 network of residues evolved to regulate nsp12 and nsp14 activity or stability in the ExoN(-)  
229 background.

230

231 **Fixed mutations in nsp12 and nsp14 in MHV-ExoN(-) P250 directly correlate with**  
232 **increased resistance to multiple nucleoside analogs.** To determine approximately when the  
233 mutations in nsp12 and nsp14 arose, we performed di-deoxy sequencing across these protein-  
234 coding regions roughly every 20 passages (P10, 31, 50, 72, 90, 100, 120, 140, 160, 180, 200, 220,  
235 240). By this method, we detected consensus NS mutations at P10, P50, and P160 for nsp12, and  
236 at P50 and P160 for nsp14 (Fig. 6). Both nsp12 and nsp14 carried their full complement of P250  
237 consensus mutations by P160, except for a minority variant (D913E) in nsp12 maintained at  
238 <50% of the population between P200 and P250. These passage levels correlated with increased  
239 replication of MHV-ExoN(-) (Fig. 2B) and with decreasing sensitivity to 5-FU (Fig. 7A). Neither  
240 replication nor 5-FU sensitivity of MHV-ExoN(-) changed substantially between P160 and P250.  
241 To determine whether MHV-ExoN(-) evolved increased resistance to multiple nucleoside

242 analogs, we treated virus-infected cells with three additional analogs that are substrates for viral  
243 RdRps: ribavirin (RBV), a guanine analog that inhibits viral replication through multiple  
244 mechanisms, including mutagenesis and inhibition of purine biosynthesis (66); 5-azacytidine  
245 (AZC), an RNA mutagen (67); and 2'-C-methyladenosine (CMeA), which is proposed to  
246 incorporate in viral RNA and terminate nascent transcripts (68). As with 5-FU, we observed  
247 dose-dependent sensitivity to RBV, AZC, and CMeA in all MHV-ExoN(-) viruses that decreased  
248 with increasing passage number (Fig. 7B-D). Except against AZC, MHV-ExoN(-) sensitivity did  
249 not change between P160 and P250. Together, these data demonstrate that MHV-ExoN(-)  
250 evolved increased resistance to multiple nucleoside analogs that correlated with the length of  
251 passage and the acquisition of mutations in nsp12 and nsp14. Importantly, this occurred in the  
252 absence of specific mutagenic selection and without reversion of ExoN motif I. This increased  
253 general selectivity towards all four classes of nucleotide strongly advocates for an overall  
254 increase in fidelity in MHV-ExoN(-) P250.

255

256 **Mutations in nsp12 partially account for increased resistance of MHV-ExoN(-) P250 to**  
257 **multiple nucleoside analogs.** We hypothesized that mutations in MHV-ExoN(-) P250 nsp12 and  
258 nsp14 were most likely to impact replication and nucleoside analog sensitivity based on their  
259 enzymatic activities and temporal association with phenotypic changes. To test this hypothesis,  
260 we engineered recombinant MHV-ExoN(-) to encode the P250 nsp12 and nsp14, alone and  
261 together. Expression of nsp12-P250 and nsp14-P250, alone or in combination, altered replication  
262 kinetics of MHV-ExoN(-) without affecting peak titers (Fig. 8A) and increased gRNA levels  
263 above those of MHV-ExoN(-) P3 (Fig. 8B). Nsp12-P250 had a greater effect than nsp14-P250 on  
264 the sensitivity of MHV-ExoN(-) to all analogs tested, and the combination of nsp12- and nsp14-

265 P250 did not increase resistance above nsp12-P250 alone (Fig. 8C-E). None of the recombinant  
266 viruses recapitulated the resistance phenotypes of the MHV-ExoN(-) P250 population. Together,  
267 these data demonstrate that nsp12-P250 mutations only partially account for the nucleoside  
268 analog resistance of MHV-ExoN(-) P250, and that adaptations in nsp12-P250 mask those in  
269 nsp14-P250. We also can conclude that the nsp14-P250 D272E active site mutation does not  
270 correct the defect caused by the motif I DE→AA substitutions. Together, the results suggest  
271 possible limitations for fidelity adaptation in nsp12 and nsp14, and also the exciting prospect that  
272 other CoV proteins participate in fidelity regulation within MHV-ExoN(-) P250.

273

274 **Resistance to nucleoside analogs correlates with MHV-ExoN(-) fitness.** We hypothesized that  
275 mutations in nsp12 and nsp14 provided a fitness advantage to MHV-ExoN(-) P250. We  
276 competed the recombinant viruses with a reference MHV-ExoN(-) virus (P1 stock) containing 10  
277 silent mutations in the nsp2 coding region. Mutant and reference viruses were detected in the  
278 mixed infection by real-time quantitative PCR using dual-labeled probes specific for each virus.  
279 MHV-ExoN(-) P3 showed a modest fitness advantage over the reference P1 MHV-ExoN(-)  
280 silent (Fig. 8F, solid green). MHV-ExoN(-) P250 profoundly outcompeted MHV-ExoN(-) silent,  
281 with >1000-fold more MHV-ExoN(-) P250 genomes present at the end of passage 1 (Fig. 8F,  
282 dotted green). MHV-ExoN(-) nsp12-P250 had greater relative fitness than MHV-ExoN(-) nsp14-  
283 P250, and MHV-ExoN(-) nsp12/14-P250 was intermediate between the single recombinants,  
284 implicating a complex evolutionary interaction between these two proteins. The measured fitness  
285 correlated with the patterns of nucleoside analog resistance and RNA synthesis associated with  
286 mutations in nsp12 and nsp14, suggesting a link between the evolution of these virus phenotypes.

287 The result also confirms that nsp12 and nsp14 are important but not sufficient to account for the  
288 significantly increased fitness of MHV-ExoN(-) P250 relative to MHV-ExoN(-) P3.  
289

290 **DISCUSSION**

291 High-fidelity replication is proposed to be critical for maintaining the large (+)ssRNA genomes  
292 of CoVs (40, 69). Our previous studies demonstrate that ExoN-mediated proofreading is required  
293 for replicative fitness, nucleoside analog resistance, and virulence (16, 17, 38). Yet no direct test  
294 of the requirement for ExoN activity for long-term survival and stability of the CoV genome had  
295 been performed. In this study, we describe experimental adaptive evolution of WT-MHV and  
296 MHV-ExoN(-) during long-term passage in cell culture. WT-MHV evolved increased replication  
297 kinetics over 250 passages, with few consensus mutations arising in the WT-MHV P250 genome.  
298 In contrast, MHV-ExoN(-) accumulated 8-fold more mutations than WT-MHV, none of which  
299 occurred at the ExoN-inactivating mutations. Nevertheless, MHV-ExoN(-) P250 demonstrated  
300 increased replication kinetics and increased resistance to nucleoside analogs as compared to  
301 MHV-ExoN(-) P3. Mutations within nsp12-P250 conferred greater resistance to nucleoside  
302 analogs than nsp14-P250, suggesting that secondary mutations within nsp14 cannot restore ExoN  
303 activity without the full complement of catalytic DE-E-D residues. These results further support  
304 our studies and those from other exonucleases that the motif I DE residues are absolutely  
305 required for ExoN activity. However, mutations in nsp12-P250 also were not sufficient, alone or  
306 in combination with nsp14-P250, to account for the increased nucleoside analog resistance of the  
307 MHV-ExoN(-) P250 virus population, indicating that other proteins contribute to resistance or  
308 that the virus evolved increased mutational robustness over passage.

309

310 **Why doesn't MHV-ExoN(-) revert over long-term passage?** We detected no primary  
311 reversion at the DE→AA substitutions MHV-ExoN(-) at any passage tested. These data are  
312 consistent with and significantly extend previous studies reporting genotypic stability of ExoN(-)



313 motif I in MHV and SARS-CoV (13, 14, 16, 17, 38). Complete reversion within ExoN(-) motif I  
314 to DE would require four nucleotide changes. This likely represents a high genetic barrier to  
315 reversion, especially given that fitness can be increased by mutations outside of nsp14-ExoN.  
316 Single and double nucleotide changes within motif I could restore acidic charge to individual  
317 residues (e.g. motif I EA, AD, ED, etc). However, the active site compositions of DEDDh  
318 exonucleases, such as the Klenow fragment, are so stringent that even conservative mutations  
319 (D-to-E or E-to-D) reduce ExoN activity by >96% (70). Thus, intermediate amino acid changes  
320 may not have a selective advantage compared to motif I AA, limiting the evolutionary pathways  
321 to reversion. However, nsp14-P250 increased competitive fitness in the MHV-ExoN(-)  
322 background (Fig. 8F), demonstrating a modest capacity for fitness adaptation in nsp14 outside of  
323 the catalytic residues. Whether these mutations resulted from genetic drift or positive selection  
324 remains unclear. Nevertheless, our data show that MHV-ExoN(-) can adapt for increased fitness  
325 without fully restoring exoribonuclease activity. Understanding the mechanisms by which MHV-  
326 ExoN(-) P250 compensated for ExoN activity could allow recovery of ExoN(-) variants of other  
327 CoVs, such as transmissible gastroenteritis virus and human CoV 229E, which to date have been  
328 unrecoverable as ExoN(-) recombinants (43, 71).

329

330 **CoV adaptation to loss of ExoN-mediated proofreading.** High-fidelity replication, made  
331 possible in part by the proofreading activity of nsp14-ExoN, is thought to have been essential for  
332 the expansion and maintenance of large CoV genomes (39, 40, 69). Compensation for the loss of  
333 ExoN could have occurred through the evolution of increased fidelity via other replicase proteins.  
334 Mutations conferring increased replication fidelity to RNA viruses have most frequently been  
335 mapped to RdRps (24, 25, 30, 72). Three findings suggest that mutations within nsp12-P250

336 confer increased polymerase fidelity. First, nonsynonymous mutations to the RdRp arose in the  
337 low-fidelity MHV-ExoN(-) but not in the presence of proofreading (WT-MHV). Second, five of  
338 the mutations lie in or near structural motifs important for fidelity regulation in other RdRps.  
339 Amino acid substitutions in the fingers and palm domains have been repeatedly shown to affect  
340 viral RdRp fidelity (25, 34), and we have recently reported a fingers mutation (nsp12-V553I) that  
341 likely increases the fidelity of the MHV RdRp (17). Our modeled structure predicts that nsp12-  
342 P250 contains three mutations in the palm domain and one in the fingers domain, with the  
343 M814K thumb domain mutation lying near the palm (Fig. 6A). Third, exchange of nsp12-P250  
344 alone into the background of MHV-ExoN(-) reduced the susceptibility of MHV-ExoN(-) to three  
345 different nucleoside analogs (Fig. 8). Although resistance to a single nucleoside analog can  
346 evolve without increasing overall fidelity, resistance to multiple nucleoside analogs suggests a  
347 broadly increased capacity to discriminate modified nucleotides {Arias:2008bp, Sierra:2007dg,  
348 Zeng:2013dg, Guo:2016fx}. Thus, nsp12-P250 is likely a high-fidelity polymerase. However,  
349 nsp12-P250 only partially accounts for the MHV-ExoN(-) P250 nucleoside analog resistance  
350 phenotype (Fig. 8), suggesting a possible limit to the compensation achievable by mutating the  
351 RdRp alone. Further, the effects of mutations in nsp12-P250 and nsp14-P250 are not additive  
352 and may be antagonistic when isolated from the whole passaged virus (Fig. 8), indicating that the  
353 relationships between nsp12- and nsp14-P250 mutations are likely evolutionarily linked with  
354 those in other MHV proteins. In fact, a substantial component of the evolved resistance to  
355 nucleoside analogs cannot be explained by nsp12-P250 and nsp14-P250, alone or together. In  
356 support of this hypothesis, we identified several nonsynonymous mutations in other replicase  
357 proteins, such as nsps 8, 9, 13, and 15. SARS-CoV nsp8 and nsp13 have functional interactions  
358 with nsp12, acting as a primase/processivity factor (74, 75) and a helicase/NTPase, respectively

359 (76). Processivity factors in herpes simplex virus and *Mycobacterium tuberculosis* regulate DNA  
360 polymerase fidelity by balancing polymerase extension and exonuclease activity (77, 78), and  
361 helicases in chikungunya virus and foot-and-mouth disease virus can evolve to increase fidelity  
362 (79) and alter the frequency of ribavirin-induced mutations (80), respectively. SARS-CoV nsp9  
363 has RNA-binding activities and is proposed to participate in the multi-protein replicase complex  
364 (39, 81), and MHV nsp15 is a uridylylate-specific endoribonuclease (82). Both could plausibly be  
365 involved in modifying polymerase activity. Additionally, it remains possible that evolution for  
366 increased fidelity could involve proteins outside the canonical replication complex (nsps7-16),  
367 including those in the structural and accessory cassette. Thus, while immediate studies will focus  
368 on testing whether replicase proteins nsp8, 9, 13, and 15 regulate fidelity, it is exciting to  
369 consider the possibility that this virus-directed discovery approach will reveal novel interactions  
370 between multiple MHV proteins.

371  
372 **Has MHV-ExoN(-) P250 evolved robustness as a defense against ExoN(-) infidelity?** Three  
373 of the nucleoside analogs used in this study (5-FU, ribavirin, and 5-azacytidine) reduce virus  
374 titers at least in part through mutagenesis (16, 66, 67). Although the resistance of MHV-ExoN(-)  
375 P250 to these RNA mutagens may be fully explained by the evolution of a high-fidelity  
376 replication complex, an additional possibility is that MHV-ExoN(-) P3 evolved increased  
377 mutational robustness. Mutational robustness is the capacity of a virus to buffer the fitness  
378 effects of mutations, which are most frequently detrimental or lethal (8-12). Thus, in a low-  
379 fidelity virus like MHV-ExoN(-) P3, genomic mutations which reduce the fitness cost of  
380 subsequent mutations can provide a selective advantage (83-85). The relationship between  
381 fidelity and robustness has been demonstrated for poliovirus and coxsackievirus B3: wild-type

382 poliovirus encodes a lower-fidelity polymerase than coxsackievirus and is more mutationally  
383 robust (86). Selection for increased robustness could explain the ~90 synonymous changes in  
384 MHV-ExoN(-) P250. Synonymous changes can alter codons to reduce the probability of non-  
385 conservative amino acid changes (87). Alternatively, the increased population size of MHV-  
386 ExoN(-) P250 could promote robustness by a “safety-in-numbers” effect, allowing efficient  
387 purging of low-fitness mutants while maintaining population fitness (88). Large populations also  
388 increase the likelihood of co-infection, allowing complementation between viral genomes. We  
389 did not observe an effect of increased replication in MHV-ExoN(-) P250 nucleoside analog  
390 resistance (Fig. 5), but a recent study with poliovirus suggests that mutagenized populations have  
391 elevated coinfection frequencies (89). Thus, complementation may contribute to MHV-ExoN(-)  
392 P250 nucleoside analog resistance. Conflicting evidence exists regarding whether mutational  
393 robustness itself affects the sensitivity to RNA mutagens (86, 87, 90); nevertheless, the  
394 robustness of MHV-ExoN(-) P250 merits further investigation.

395

396 **Conclusions.** One of the defining features of CoV replication is the proofreading activity of the  
397 nsp14 exoribonuclease that is a critical determinant of CoV replication, fidelity, and fitness. We  
398 here show that CoVs also have the capacity to compensate for loss of ExoN activity through a  
399 network of mutations in nsp12, nsp14, and elsewhere in the genome. Thus, while nsp14-ExoN  
400 appears to play a dominant role in CoV replication fidelity, its activity is likely closely tied to a  
401 highly evolved network of proteins. The demonstrated co-adaptation for replication, fidelity, and  
402 competitive fitness within MHV-ExoN(-) supports the hypothesis that these roles are linked  
403 functionally and evolutionarily. Genetic and biochemical testing of the rich mutational resource  
404 revealed in MHV-ExoN(-) P250 will likely inform the design of countermeasures for endemic

405 and emerging CoVs by defining novel common targets for stable virus attenuation or direct

406 inhibition.

407

## 408 MATERIALS AND METHODS

409 **Cell culture.** DBT-9 (delayed brain tumor, murine astrocytoma clone 9) cells were maintained  
410 as described previously (91). Baby hamster kidney (BHK) cells stably expressing the MHV-A59  
411 receptor, CEACAM1, [BHK-R, (15)] were maintained under selection with 0.8 mg/ml of G418  
412 (Mediatech) as described previously (91).

413

414 **Long-term passage of virus and stock generation.** The infectious cDNA clone for MHV-A59  
415 and the recovery of MHV-ExoN(-) are described previously (14, 91). Long-term passage was  
416 initiated by infecting subconfluent monolayers of DBT-9 cells in 25 cm<sup>2</sup> flasks with either wild-  
417 type MHV-A59 or MHV-ExoN(-) at a multiplicity of infection (MOI) of approximately 0.1  
418 particle forming unit per cell (PFU/cell). One lineage of each virus was passaged blindly for a  
419 total of 250 passages (P250). Supernatant was harvested at each passage and stored at -80°C.  
420 Total RNA was harvested for most passages using 1 ml of TRIzol Reagent (Ambion) per 25 cm<sup>2</sup>  
421 flask and stored at -80°C. Virus stocks of select intermediate passages were generated by  
422 infecting a subconfluent 150 cm<sup>2</sup> flask of DBT-9 cells at an MOI of 0.01 PFU/cell.

423 Approximately 24 hours post-infection the flask was frozen at -80°C and the supernatant was  
424 clarified by centrifugation at 4,000 x g (Sorvall RC 3B Plus; HA-6000A rotor) for 10 min at 4°C.  
425 The virus titer of each stock was determined by plaque assay using DBT-9 cells as described  
426 previously (14, 91). For plaque assays of viruses containing the spike protein from MHV-ExoN(-  
427 ) P250, which does not form syncytia, plaques were visualized with neutral red (Sigma #N6264,  
428 diluted 1:10 in PBS containing calcium and magnesium). Neutral red was added 24 hours after  
429 plating and incubated for an additional 3-8 hours before formaldehyde fixation. Plaque  
430 purification was performed by infecting DBT cells with serial dilutions of virus and overlaying

431 the cultures with agar. Single plaques were isolated, resuspended in PBS containing calcium and  
432 magnesium, and inoculated onto fresh DBTs. This process was completed 3 times before  
433 experimental stocks were generated, as above.

434

435 **Sequencing of virus stocks.** Following P250, RNA was purified from the harvested TRIzol  
436 samples according to the manufacturer's protocol and reverse transcribed (RT) using SuperScript  
437 III (Invitrogen) as described previously (14). Full-genome di-deoxy sequencing was performed  
438 for both WT-MHV P250 and MHV-ExoN(-) P250 using 12 overlapping amplicons  
439 approximately three kilobases in length. All coding regions were sequenced fully, and out of  
440 31,409 nucleotides, > 99% were sequenced for each virus [WT-MHV P250: 21-31,279 and  
441 MHV-ExoN(-) P250: 21-31,275]. Two microliters of RT product were used for each PCR  
442 reaction (16). Di-deoxy sequencing was performed by Genhunter Corporation (Nashville, TN) or  
443 GENEWIZ (South Plainfield, NJ). Sequence analysis was performed using MacVector version  
444 14 (MacVector, Inc.; Apex, North Carolina) using the MHV-A59 infectious clone reference  
445 genome (GenBank accession no. AY910861). The nucleotide sequences of the amplicon and  
446 sequencing primers are available upon request. Sequencing of nsp12 and nsp14 from  
447 intermediate passages was performed using TRIzol-purified RNA from infected monolayers and  
448 using the primers listed below. Primers 6M1F (5'-TTTTGGCGAGATGGTAGC-3') and 7M2R  
449 (5'-GGTAAGACAGTTTTAGGTGAG-3') were used to generate a 3,425 nucleotide amplicon  
450 containing all of nsp12. Primers 7M3F (5'-ATGCTTACCAACTATGAGC-3') and 8M3R (5'-  
451 CCGATTTGAATGGCGTAG-3') were used to generate a 2,713 nucleotide amplicon containing  
452 all of nsp14. The PCR conditions for these reactions are the same as those used to generate the  
453 amplicons used for full-genome sequencing (16).

454

455 **Replication and RNA synthesis kinetics.** Viral replication kinetics in DBT-9 cells were  
456 determined at an MOI of 1 PFU/cell or MOI of 0.01 PFU/cell as described previously (15).  
457 Supernatant (300  $\mu$ L) was harvested at the indicated time points, and the virus titer was  
458 determined by plaque assay. The accumulation of genomic RNA at an MOI of 1 PFU/cell was  
459 measured by two-step real-time quantitative RT-PCR (RT-qPCR) using intracellular RNA that  
460 was TRIzol-extracted at the time points indicated. RNA was reverse-transcribed using  
461 SuperScript III (Invitrogen), and cDNA derived from intracellular positive-sense viral RNA was  
462 measured using primers directed to nsp10. Values were normalized to levels of the endogenous  
463 control glyceraldehyde-3-phosphate dehydrogenase (GAPDH). No mutations within the primer  
464 binding sites emerged in either P250 population. The primers and amplification conditions are  
465 the same as reported previously (15), except that the RT product was diluted 1:10 prior to use.  
466 Samples were plated in technical duplicate to minimize well-to-well variation. Data are  
467 presented as  $2^{-\Delta CT}$ , where  $\Delta CT$  denotes CT (target, nsp10) minus CT (reference, GAPDH).

468

469 **Determination of specific infectivity.** Subconfluent monolayers of DBT-9 cells in 24-well  
470 plates were infected with the indicated virus at an MOI of 1 PFU/cell, and supernatant was  
471 harvested at 12 h.p.i. The levels of genomic RNA in supernatant were measured using one-step  
472 real-time quantitative RT-PCR (RT-qPCR) on TRIzol-extracted RNA as described previously  
473 (17). Briefly, genomic RNA was detected with a 5' 6-carboxyfluorescein (FAM) and 3' black  
474 hole quencher 1 (BHQ-1) labeled probe targeting nsp2 (Biosearch Technologies, Petaluma, CA),  
475 and RNA copy number was calculated by reference to an RNA standard derived from the MHV  
476 A fragment. Samples were plated in technical duplicate to minimize well-to-well variation. Titters



477 were determined by plaque assay in DBT-9 cells, and specific infectivity was calculated as PFU  
478 per supernatant genomic RNA copy.

479

480 **Nucleoside and base analog sensitivity assays.** 5-azacytidine (AZC), 5-fluorouracil (5-FU), and  
481 ribavirin (RBV) were purchased from Sigma (product numbers A2385, F6627, and R9644,  
482 respectively). Stock solutions of 5-FU and RBV were prepared in dimethyl sulfoxide (DMSO).  
483 2'-C-methyladenosine (CMeA) was received from Gilead Sciences, Inc (Foster City, CA).

484 Sensitivity assays were performed as described previously (16), except in 24-well plates at an  
485 MOI of 0.01 PFU/cell. Supernatants were harvested at 24 hours post-infection, and titers were  
486 determined by plaque assay.

487

488 **Phyre<sup>2</sup>-modeling of MHV-nsp14.** The MHV nsp14 structure was modeled with the Phyre<sup>2</sup>  
489 online program (63) using nsp14 residues 3-519, corresponding to residues 6056-6573 of the  
490 ORF1ab polyprotein. The model was analyzed using the Pymol Molecular Graphics System,  
491 Version (Schrödinger, LLC).

492

493 **Generation of nsp12 and nsp14 swaps.** Viruses containing nsp12, nsp14, or nsp12 and nsp14  
494 from MHV-ExoN(-) P250 were generated using the MHV-A59 reverse genetics system (91).  
495 RNA from the MHV-ExoN(-) P250 virus was reversed transcribed with SuperScript III  
496 (Invitrogen) and used to generate amplicons containing either nsp12 or nsp14. Each amplicon  
497 was flanked by 15 bp that overlapped with an amplicon generated from the backbone plasmid.  
498 Amplicons were inserted into MHV-A59 fragments using the InFusion HD Cloning kit (Takara  
499 Bio USA, Inc, Mountain View, CA). Nsp12 is split across MHV E and F, while nsp14 is

500 contained within MHV F. Reaction mixtures contained 50ng of vector, 200ng of insert, and 2 $\mu$ L  
501 of enzyme and were incubated for 15 minutes at 50°C. Errors were corrected by site-directed  
502 mutagenesis using Pfu Turbo polymerase (Agilent, Santa Clara, CA). The nsp12/14-P250 swap  
503 was generated through restriction digestion of the individual swaps using BsmBI and StuI  
504 followed by gel purification and assembly using T4 DNA ligase (NEB, Ipswich, MA). Viable  
505 viruses were constructed and rescued as described previously (91).

506

507 **Competitive fitness assays.** Competitor viruses were competed with an MHV-ExoN(-) virus  
508 harboring 10 silent mutations in the probe-binding region within nsp2. Subconfluent DBT-9  
509 monolayers in 24-well plates were coinfecting at a total MOI of 0.01 PFU/cell with competitor  
510 and reference viruses at a 1:1 ratio and passaged 4 times. For each passage, supernatants were  
511 harvested at 24 hours. RNA was extracted from 100 $\mu$ L of supernatant using 900 $\mu$ L of TRIzol  
512 reagent and PureLink RNA Mini Kit columns (Thermo Scientific, Waltham, MA), and 150 $\mu$ L  
513 was used to infect fresh cells in a 24-well plate (total MOI estimated at 1 PFU/cell). The  
514 proportion of each virus was determined by real-time RT-qPCR from the infection supernatant  
515 using two Taqman probes with different fluorescent dyes in separate reactions. Competitor  
516 viruses were detected with the same probe used in specific infectivity analyses (14). Reference  
517 viruses were detected by a probe targeting the same region but with 10 silent mutations (5'-  
518 TCCGAAGTACTGCAACCCCAAGTG-3') and labeled with 5' Quasar 670 and 3' black hole  
519 quencher 2 (BHQ-2) (Biosearch Technologies, Petaluma, CA). RNA copy number was  
520 calculated by reference to an RNA standard generated by *in vitro* transcription of the  
521 corresponding MHV A fragment, and relative RNA abundance was calculated as the ratio of  
522 competitor genomes to reference genomes.

523

524 **Statistical analysis.** GraphPad Prism 6 (La Jolla, CA) was used to perform statistical tests. Only  
525 the comparisons shown [e.g. ns or asterisk(s)] within the figure or legend were performed. In  
526 many cases the data were normalized to untreated controls. This was performed using GraphPad  
527 Prism 6. The number of replicate samples is denoted within each figure legend.

528

529 **Accession numbers.** Full-length genome sequences for WT-MHV P250 and MHV-ExoN(-)  
530 P250 have been deposited in GenBank (accession numbers MF618252 and MF618253,  
531 respectively).

532

533 **ACKNOWLEDGEMENTS**

534 We thank members of the Denison laboratory for valuable discussions. This work was supported  
535 by United States Public Health Service awards R01-AI108197 (M.R.D), T32-GM007347  
536 (K.W.G), F30-AI129229 (K.W.G), T32-HL07751 (J.B.C), T32-AI089554 (N.R.S.), T32-  
537 AI095202 (E.C.S.), and F32-AI108102 (E.C.S.), all from the National Institutes of Health. The  
538 content is solely the responsibility of the authors and does not necessarily represent the official  
539 views of the National Institutes of Health. The authors declare no conflicts of interest.

540

541 **FIGURE LEGENDS**

542

543 **Figure 1. MHV genome organization and nsp14 exoribonuclease motifs.** (*Top*) The MHV  
544 genome is a 31.4kb, capped (dark circle), and polyadenylated positive sense RNA molecule. The  
545 first two thirds of the genome encode 16 nonstructural proteins translated as a single polyprotein  
546 with a ribosomal frameshift. The final one third encodes the structural proteins. (*Inset*) Nsp14  
547 encodes an exoribonuclease (solid blue) and N7-methyltransferase (hatched blue) and has 3 zinc  
548 fingers (gray boxes) predicted from the solved SARS nsp10/14 crystal structure (PDB 5C8U)  
549 (45). Catalytic residues for ExoN are marked with white boxes, and the engineered mutations for  
550 MHV-ExoN(-) are shown below the genome. The nsp12 RNA-dependent RNA polymerase is  
551 highlighted in red.

552

553 **Figure 2. MHV-ExoN(-) evolved increased replicative capacity over long-term passage.**  
554 Replication curves were performed for the indicated viruses during high MOI (1 PFU/cell) (*A*)  
555 and low MOI (0.01 PFU/cell) (*B*) infections. (*C*) WT-MHV P250 and MHV-ExoN(-) P250 were  
556 plaque purified three times, and replication curves were performed in parallel with the full  
557 population (MOI = 0.01 PFU/cell. Supernatants were collected at the indicated times post  
558 infection, and titers were determined by plaque assay. Data for *A-C* represent mean and standard  
559 deviation of n = 3.

560

561 **Figure 3. Mutation locations within passaged viruses.** Mutations present at >50% by di-deoxy  
562 sequencing at passage 250 in WT-MHV (*A*) and MHV-ExoN(-) (*B*). Nonsynonymous mutations  
563 (red), noncoding mutations (cyan), and deletions (green boxes) are plotted above the schematic,

564 and synonymous mutations (purple) are below.

565

566 **Figure 4. MHV-ExoN(-) P250 has increased genomic RNA accumulation and increased**

567 **resistance to 5-fluorouracil.** (A) Cells were infected with the indicated viruses at MOI = 1

568 PFU/cell, and intracellular RNA was harvested using TRIzol at the indicated times post infection.

569 MHV genomic RNA was detected using SYBR green and primers directed to nsp10, and values

570 were normalized to intracellular GAPDH. (B) Same data as in panel (A) normalized to RNA

571 level for each virus at 4 hours post infection. Data represent mean and standard error for n = 9 (3

572 triplicate experiments). (C) Sensitivity of passaged viruses to 5-FU during low MOI infection

573 (0.01 PFU/cell). Cells were treated with the indicated concentrations of 5-FU for 30 minutes

574 prior to infection, and supernatants were harvested at 24 hours post-infection and titered by

575 plaque assay. Data represent change in titer relative to untreated control and plotted as mean and

576 standard error of n = 6 (two triplicate experiments). For panel C, statistical significance for

577 change in titer of MHV-ExoN(-) P250 relative to MHV-ExoN(-) P3 was determined Mann-

578 Whitney test (\*P<0.05, \*\*<0.01, \*\*\*P<0.001).

579

580 **Figure 5. Mutations in the spike envelope protein from MHV-ExoN(-) P250 increase**

581 **replicative capacity but do not affect sensitivity to 5-fluorouracil.** (A) Replication kinetics of

582 indicated viruses (MOI = 0.01 PFU/cell) plotted as mean and standard deviation with n = 3. (B)

583 Specific infectivity of indicated viruses 12 hours post-infection (MOI = 1 PFU/cell). Data

584 represent mean and standard error of n = 6 (two triplicate experiments). (C) Sensitivity of

585 indicated viruses to 5-fluorouracil during low MOI infection (0.01 PFU/cell), as described in Fig.

586 4. Data represent mean and standard error of n = 6 (two triplicate experiments). For panel B,

587 statistical significance was determined using one-way ANOVA. For Panel C, statistical  
588 significance for change in titer of MHV-ExoN(-) spike-P250 relative to MHV-ExoN(-) P3 was  
589 determined using Mann-Whitney test (\* $P < 0.05$ , \*\* $P < 0.01$ , \*\*\* $P < 0.001$ , ns = not significant).

590

591 **Figure 6. The timing of fixation of mutations in nsp12-RdRp and nsp14-ExoN within**  
592 **MHV-ExoN(-) correlates with increased resistance to nucleoside analogs.** (A) A schematic of  
593 nsp12-RdRp with the CoV-specific region and the canonical fingers, palm, and thumb domains  
594 of RdRps is shown. The nsp12-RdRp coding region was sequenced at the indicated passage, and  
595 the nonsynonymous changes are plotted; gray boxes indicate consensus changes, and hatched  
596 boxes indicate variants present at  $< 50\%$  of the population by di-deoxy sequencing. At right,  
597 mutations are marked in orange on a Phyre<sup>2</sup>-modeled structure of MHV-nsp12, with the active  
598 site residues marked in yellow (17). RdRp domains are colored according to the linear schematic.  
599 *NB*: M288T, L376P, and D913E lie outside the modeled region and thus are not marked. (B) A  
600 schematic of nsp14 with the ExoN and N7-methyltransferase domains is shown, with mutation  
601 plotting as in panel A. The black box denotes a mutation to ExoN motif III. At right, mutations  
602 are marked in orange on a Phyre<sup>2</sup>-modeled structure of the MHV-nsp14/nsp10 complex.  
603 Domains are colored according to the linear schematic.

604

605 **Figure 7. MHV-ExoN(-) evolved increased resistance to nucleoside and base analogs over**  
606 **passage.** Sensitivity of isogenic and passaged viruses to the nucleoside analogs, 5-FU (A),  
607 ribavirin (B), 5-azacytidine (C), and 2'-C-methyladenosine (D) during low MOI infection (0.01  
608 PFU/cell) as described in Fig. 4. Data represent mean and standard error for  $n = 6$  (2 triplicate  
609 experiments). *NB*: Data for WT-MHV, WT-MHV P250, MHV-ExoN(-) P3, MHV-ExoN(-) P250

610 in panel (A) are the same as shown in Fig. 4C. Statistical significance for change in titer of  
611 MHV-ExoN(-) P3 relative to MHV-ExoN(-) P250 was determined using Mann-Whitney test  
612 (\*P<0.05, \*\*<0.01, \*\*\*P<0.001).

613

614 **Figure 8. Mutations in nsp12-RdRp and nsp14-ExoN from MHV-ExoN(-) P250**  
615 **incompletely increase resistance to RNA mutagens and increase fitness of MHV-ExoN(-).**

616 (A) Replication kinetics of recombinant P250 viruses (MOI = 0.01 PFU/cell) plotted as mean and  
617 standard deviation with n = 3. (B) Genomic RNA accumulation relative to intracellular GAPDH,  
618 as described in Fig. 4. Data represent mean and standard error for n = 6-9 (2-3 triplicate  
619 experiments). (C-E) Sensitivity of recombinant MHV-ExoN(-) viruses to 5-FU (C), ribavirin (D),  
620 and 5-azacytidine (E) during low MOI infection (0.01 PFU/cell) as described in Fig. 4. Data  
621 represent mean and standard error of n = 6. (F) Recombinant viruses were competed against a  
622 reference MHV-ExoN(-) containing 10 silent mutations within nsp2. The ratio of viral genome  
623 copies relative to the MHV-ExoN(-) reference is plotted. Data represent mean and standard error  
624 of n = 6. NB: MHV-ExoN(-) P250 data set contains 4 replicates at passage 3 and a single  
625 replicate at passage 4 due to undetectable levels of MHV-ExoN(-) silent. For panels C-E,  
626 statistical significance for change in titer of swapped viruses relative to MHV-ExoN(-) P3 at  
627 highest drug concentration tolerated was determined using Mann-Whitney test (\*P<0.05,  
628 \*\*<0.01, \*\*\*P<0.001, ns = not significant). For panel F, statistical significance for the indicated  
629 comparisons was determined using Mann-Whitney test. Boxed points have the same P value.

630

631 **Supplemental Figure 1. Deleted regions within WT-MHV P250 and MHV-ExoN(-) P250.**

632



633 **REFERENCES**

- 634 1. **Steinhauer DA, Domingo E, Holland JJ.** 1992. Lack of evidence for proofreading  
635 mechanisms associated with an RNA virus polymerase. *Gene* **122**:281–288.
- 636 2. **Sanjuán R, Nebot MR, Chirico N, Mansky LM, Belshaw R.** 2010. Viral mutation rates.  
637 *J Virol* **84**:9733–9748.
- 638 3. **Drake JW, Holland JJ.** 1999. Mutation rates among RNA viruses. *Proc Natl Acad Sci*  
639 *USA* **96**:13910–13913.
- 640 4. **Bull JJ, Sanjuán R, Wilke CO.** 2007. Theory of lethal mutagenesis for viruses. *J Virol*  
641 **81**:2930–2939.
- 642 5. **Domingo E, Sheldon J, Perales C.** 2012. Viral quasispecies evolution. *Microbiol Mol*  
643 *Biol Rev* **76**:159–216.
- 644 6. **Bradwell K, Combe M, Domingo-Calap P, Sanjuán R.** 2013. Correlation between  
645 mutation rate and genome size in riboviruses: mutation rate of bacteriophage Q $\beta$ . *Genetics*  
646 **195**:243–251.
- 647 7. **Gago S, Elena SF, Flores R, Sanjuán R.** 2009. Extremely high mutation rate of a  
648 hammerhead viroid. *Science* **323**:1308–1308.
- 649 8. **Peris JB, Davis P, Cuevas JM, Nebot MR, Sanjuán R.** 2010. Distribution of Fitness  
650 Effects Caused by Single-Nucleotide Substitutions in Bacteriophage  $\phi$ 1. *Genetics*  
651 **185**:603–609.
- 652 9. **Malpica JM, Fraile A, Moreno I, Obies CI, Drake JW, García-Arenal F.** 2002. The

- 653 rate and character of spontaneous mutation in an RNA virus. *Genetics* **162**:1505–1511.
- 654 10. **Elena SF, Moya A.** 1999. Rate of deleterious mutation and the distribution of its effects  
655 on fitness in vesicular stomatitis virus. *Journal of Evolutionary Biology* **12**:1078–1088.
- 656 11. **Visher E, Whitefield SE, McCrone JT, Fitzsimmons W, Lauring AS.** 2016. The  
657 Mutational Robustness of Influenza A Virus. *PLoS Pathog* **12**:e1005856–25.
- 658 12. **Sanjuán R, Moya A, Elena SF.** 2004. The distribution of fitness effects caused by single-  
659 nucleotide substitutions in an RNA virus. *Proc Natl Acad Sci USA* **101**:8396–8401.
- 660 13. **Eckerle LD, Becker MM, Halpin RA, Li K, Venter E, Lu X, Scherbakova S, Graham**  
661 **RL, Baric RS, Stockwell TB, Spiro DJ, Denison MR.** 2010. Infidelity of SARS-CoV  
662 Nsp14-exonuclease mutant virus replication is revealed by complete genome sequencing.  
663 *PLoS Pathog* **6**:e1000896.
- 664 14. **Eckerle LD, Lu X, Sperry SM, Choi L, Denison MR.** 2007. High fidelity of murine  
665 hepatitis virus replication is decreased in nsp14 exoribonuclease mutants. *J Virol*  
666 **81**:12135–12144.
- 667 15. **Smith EC, Case JB, Blanc H, Isakov O, Shomron N, Vignuzzi M, Denison MR.** 2015.  
668 Mutations in coronavirus nonstructural protein 10 decrease virus replication fidelity. *J*  
669 *Virol* **89**:6418–6426.
- 670 16. **Smith EC, Blanc H, Surdel MC, Vignuzzi M, Denison MR.** 2013. Coronaviruses  
671 lacking exoribonuclease activity are susceptible to lethal mutagenesis: evidence for  
672 proofreading and potential therapeutics. *PLoS Pathog* **9**:e1003565.

- 673 17. **Sexton NR, Smith EC, Blanc H, Vignuzzi M, Peersen OB, Denison MR.** 2016.  
674 Homology-Based Identification of a Mutation in the Coronavirus RNA-Dependent RNA  
675 Polymerase That Confers Resistance to Multiple Mutagens. *J Virol* **90**:7415–7428.
- 676 18. **Arias A, Arnold JJ, Sierra M, Smidansky ED, Domingo E, Cameron CE.** 2008.  
677 Determinants of RNA-dependent RNA polymerase (in)fidelity revealed by kinetic  
678 analysis of the polymerase encoded by a foot-and-mouth disease virus mutant with  
679 reduced sensitivity to ribavirin. *J Virol* **82**:12346–12355.
- 680 19. **Zeng J, Wang H, Xie X, Yang D, Zhou G, Yu L.** 2013. An increased replication fidelity  
681 mutant of foot-and-mouth disease virus retains fitness in vitro and virulence in vivo.  
682 *Antiviral Res* **100**:1–7.
- 683 20. **Zeng J, Wang H, Xie X, Li C, Zhou G, Yang D, Yu L.** 2014. Ribavirin-resistant  
684 variants of foot-and-mouth disease virus: the effect of restricted quasispecies diversity on  
685 viral virulence. *J Virol* **88**:4008–4020.
- 686 21. **Xie X, Wang H, Zeng J, Li C, Zhou G, Yang D, Yu L.** 2014. Foot-and-mouth disease  
687 virus low-fidelity polymerase mutants are attenuated. *Arch Virol* **159**:2641–2650.
- 688 22. **Sierra M, Airaksinen A, González-López C, Agudo R, Arias A, Domingo E.** 2007.  
689 Foot-and-mouth disease virus mutant with decreased sensitivity to ribavirin: implications  
690 for error catastrophe. *J Virol* **81**:2012–2024.
- 691 23. **Vignuzzi M, Stone JK, Arnold JJ, Cameron CE, Andino R.** 2006. Quasispecies  
692 diversity determines pathogenesis through cooperative interactions in a viral population.  
693 *Nature* **439**:344–348.

- 694 24. **Vignuzzi M, Wendt E, Andino R.** 2008. Engineering attenuated virus vaccines by  
695 controlling replication fidelity. *Nat Med* **14**:154–161.
- 696 25. **Pfeiffer JK, Kirkegaard K.** 2003. A single mutation in poliovirus RNA-dependent RNA  
697 polymerase confers resistance to mutagenic nucleotide analogs via increased fidelity. *Proc*  
698 *Natl Acad Sci USA* **100**:7289–7294.
- 699 26. **Arnold JJ, Vignuzzi M, Stone JK, Andino R, Cameron CE.** 2005. Remote site control  
700 of an active site fidelity checkpoint in a viral RNA-dependent RNA polymerase. *J Biol*  
701 *Chem* **280**:25706–25716.
- 702 27. **Liu X, Yang X, Lee CA, Moustafa IM, Smidansky ED, Lum D, Arnold JJ, Cameron**  
703 **CE, Boehr DD.** 2013. Vaccine-derived mutation in motif D of poliovirus RNA-dependent  
704 RNA polymerase lowers nucleotide incorporation fidelity. *J Biol Chem* **288**:32753–32765.
- 705 28. **Weeks SA, Lee CA, Zhao Y, Smidansky ED, August A, Arnold JJ, Cameron CE.**  
706 2012. A Polymerase mechanism-based strategy for viral attenuation and vaccine  
707 development. *J Biol Chem* **287**:31618–31622.
- 708 29. **Korboukh VK, Lee CA, Acevedo A, Vignuzzi M, Xiao Y, Arnold JJ, Hemperly S,**  
709 **Graci JD, August A, Andino R, Cameron CE.** 2014. RNA virus population diversity, an  
710 optimum for maximal fitness and virulence. *J Biol Chem* **289**:29531–29544.
- 711 30. **Coffey LL, Beeharry Y, Bordería AV, Blanc H, Vignuzzi M.** 2011. Arbovirus high  
712 fidelity variant loses fitness in mosquitoes and mice. *Proc Natl Acad Sci USA* **108**:16038–  
713 16043.

- 714 31. **Rozen-Gagnon K, Stapleford KA, Mongelli V, Blanc H, Failloux A-B, Saleh M-C,**  
715 **Vignuzzi M.** 2014. Alphavirus mutator variants present host-specific defects and  
716 attenuation in mammalian and insect models. *PLoS Pathog* **10**:e1003877.
- 717 32. **Cheung PPH, Watson SJ, Choy K-T, Fun Sia S, Wong DDY, Poon LLM, Kellam P,**  
718 **Guan Y, Malik Peiris JS, Yen H-L.** 2014. Generation and characterization of influenza  
719 A viruses with altered polymerase fidelity. *Nat Commun* **5**:4794.
- 720 33. **Gnädig NF, Beaucourt S, Campagnola G, Bordería AV, Sanz-Ramos M, Gong P,**  
721 **Blanc H, Peersen OB, Vignuzzi M.** 2012. Coxsackievirus B3 mutator strains are  
722 attenuated in vivo. *Proc Natl Acad Sci USA* **109**:E2294–303.
- 723 34. **Campagnola G, McDonald S, Beaucourt S, Vignuzzi M, Peersen OB.** 2015. Structure-  
724 Function Relationships Underlying the Replication Fidelity of Viral RNA-Dependent  
725 RNA Polymerases. *J Virol* **89**:275–286.
- 726 35. **Sadeghipour S, McMinn PC.** 2013. A study of the virulence in mice of high copying  
727 fidelity variants of human enterovirus 71. *Virus Research* **176**:265–272.
- 728 36. **Sadeghipour S, Bek EJ, McMinn PC.** 2013. Ribavirin-resistant mutants of human  
729 enterovirus 71 express a high replication fidelity phenotype during growth in cell culture.  
730 *J Virol* **87**:1759–1769.
- 731 37. **Meng T, Kwang J.** 2014. Attenuation of human enterovirus 71 high-replication-fidelity  
732 variants in AG129 mice. *J Virol* **88**:5803–5815.
- 733 38. **Graham RL, Becker MM, Eckerle LD, Bolles M, Denison MR, Baric RS.** 2012. A live,

- 734 impaired-fidelity coronavirus vaccine protects in an aged, immunocompromised mouse  
735 model of lethal disease. *Nat Med* **18**:1820–1826.
- 736 39. **Smith EC, Sexton NR, Denison MR.** 2014. Thinking Outside the Triangle: Replication  
737 Fidelity of the Largest RNA Viruses. *Annual Review of Virology* **1**:111–132.
- 738 40. **Gorbalenya AE, Enjuanes L, Ziebuhr J, Snijder EJ.** 2006. Nidovirales: evolving the  
739 largest RNA virus genome. *Virus Research* **117**:17–37.
- 740 41. **Brister JR, Ako-Adjei D, Bao Y, Blinkova O.** 2014. NCBI Viral Genomes Resource.  
741 *Nucleic Acids Res* **43**:gku1207–D577.
- 742 42. **Stenglein MD, Jacobson ER, Wozniak EJ, Wellehan JFX, Kincaid A, Gordon M,**  
743 **Porter BF, Baumgartner W, Stahl S, Kelley K, Towner JS, DeRisi JL.** 2014. Ball  
744 Python Nidovirus: a Candidate Etiologic Agent for Severe Respiratory Disease in Python  
745 regius. *MBio* **5**:e01484–14–e01484–14.
- 746 43. **Minskaia E, Hertzog T, Gorbalenya AE, Campanacci V, Cambillau C, Canard B,**  
747 **Ziebuhr J.** 2006. Discovery of an RNA virus 3′-5′ exoribonuclease that is critically  
748 involved in coronavirus RNA synthesis. *Proc Natl Acad Sci USA* **103**:5108–5113.
- 749 44. **Snijder EJ, Bredenbeek PJ, Dobbe JC, Thiel V, Ziebuhr J, Poon LLM, Guan Y,**  
750 **Roazanov M, Spaan WJM, Gorbalenya AE.** 2003. Unique and conserved features of  
751 genome and proteome of SARS-coronavirus, an early split-off from the coronavirus group  
752 2 lineage. *J Mol Biol* **331**:991–1004.
- 753 45. **Ma Y, Wu L, Shaw N, Gao Y, Wang J, Sun Y, Lou Z, Yan L, Zhang R, Rao Z.** 2015.

- 754 Structural basis and functional analysis of the SARS coronavirus nsp14-nsp10 complex.  
755 Proc Natl Acad Sci USA **112**:9436–9441.
- 756 46. **Zuo Y, Deutscher MP.** 2001. Exoribonuclease superfamilies: structural analysis and  
757 phylogenetic distribution. Nucleic Acids Res **29**:1017–1026.
- 758 47. **Bouvet M, Imbert I, Subissi L, Gluais L, Canard B, Decroly E.** 2012. RNA 3'-end  
759 mismatch excision by the severe acute respiratory syndrome coronavirus nonstructural  
760 protein nsp10/nsp14 exoribonuclease complex. Proc Natl Acad Sci USA **109**:9372–9377.
- 761 48. **Yokomori K, Banner LR, Lai MMC.** 1991. Heterogeneity of gene expression of the  
762 hemagglutinin-esterase (HE) protein of murine coronaviruses. Virology **183**:647–657.
- 763 49. **Luytjes W, Bredenbeek PJ, Noten AF, Horzinek MC, Spaan WJ.** 1988. Sequence of  
764 mouse hepatitis virus A59 mRNA 2: indications for RNA recombination between  
765 coronaviruses and influenza C virus. Virology **166**:415–422.
- 766 50. **Yokomori K, Lai MM.** 1991. Mouse hepatitis virus S RNA sequence reveals that  
767 nonstructural proteins ns4 and ns5a are not essential for murine coronavirus replication. J  
768 Virol **65**:5605–5608.
- 769 51. **Lissenberg A, Vrolijk MM, van Vliet ALW, Langereis MA, de Groot-Mijnes JDF,**  
770 **Rottier PJM, de Groot RJ.** 2005. Luxury at a Cost? Recombinant Mouse Hepatitis  
771 Viruses Expressing the Accessory Hemagglutinin Esterase Protein Display Reduced  
772 Fitness In Vitro. J Virol **79**:15054–15063.
- 773 52. **Gadlage MJ, Graham RL, Denison MR.** 2008. Murine coronaviruses encoding nsp2 at

- 774 different genomic loci have altered replication, protein expression, and localization. J  
775 Virol **82**:11964–11969.
- 776 53. **Zhao L, Jha BK, Wu A, Elliott R, Ziebuhr J, Gorbalenya AE, Silverman RH, Weiss**  
777 **SR**. 2012. Antagonism of the Interferon-Induced OAS-RNase L Pathway by Murine  
778 Coronavirus ns2 Protein Is Required for Virus Replication and Liver Pathology. *Cell Host*  
779 *and Microbe* **11**:607–616.
- 780 54. **Li Y, Weiss SR**. 2016. Antagonism of RNase L is required for murine coronavirus  
781 replication in Kupffer cells and liver sinusoidal endothelial cells but not in hepatocytes. *J*  
782 *Virol* JVI.01423–16–24.
- 783 55. **Zhang R, Jha BK, Ogden KM, Dong B, Zhao L, Elliott R, Patton JT, Silverman RH,**  
784 **Weiss SR**. 2013. Homologous 2′,5′-phosphodiesterases from disparate RNA viruses  
785 antagonize antiviral innate immunity. *Proc Natl Acad Sci USA* **110**:13114–13119.
- 786 56. **Sui B, Huang J, Jha BK, Yin P, Zhou M, Fu ZF, Silverman RH, Weiss SR, Peng G,**  
787 **Zhao L**. 2016. Crystal structure of the mouse hepatitis virus ns2 phosphodiesterase  
788 domain that antagonizes RNase L activation. *J Gen Virol* **97**:880–886.
- 789 57. **Schwarz B, Routledge E, Siddell SG**. 1990. Murine coronavirus nonstructural protein  
790 ns2 is not essential for virus replication in transformed cells. *J Virol* **64**:4784–4791.
- 791 58. **Zhao L, Rose KM, Elliott R, Van Rooijen N, Weiss SR**. 2011. Cell-type-specific type I  
792 interferon antagonism influences organ tropism of murine coronavirus. *J Virol* **85**:10058–  
793 10068.



- 794 59. **Pereira-Gómez M, Sanjuán R.** 2014. Delayed lysis confers resistance to the nucleoside  
795 analogue 5-fluorouracil and alleviates mutation accumulation in the single-stranded DNA  
796 bacteriophage  $\phi$ X174. *J Virol* **88**:5042–5049.
- 797 60. **Ng KKS, Arnold JJ, Cameron CE.** 2008. Structure-function relationships among RNA-  
798 dependent RNA polymerases. *Curr Top Microbiol Immunol* **320**:137–156.
- 799 61. **Brockway SM, Clay CT, Lu XT, Denison MR.** 2003. Characterization of the expression,  
800 intracellular localization, and replication complex association of the putative mouse  
801 hepatitis virus RNA-dependent RNA polymerase. *J Virol* **77**:10515–10527.
- 802 62. **Lehmann KC, Gulyaeva A, Zevenhoven-Dobbe JC, Janssen GMC, Ruben M,**  
803 **Overkleeft HS, van Veelen PA, Samborskiy DV, Kravchenko AA, Leontovich AM,**  
804 **Sidorov IA, Snijder EJ, Posthuma CC, Gorbalenya AE.** 2015. Discovery of an  
805 essential nucleotidylating activity associated with a newly delineated conserved domain in  
806 the RNA polymerase-containing protein of all nidoviruses. *Nucleic Acids Res* **43**:8416–  
807 8434.
- 808 63. **Kelley LA, Mezulis S, Yates CM, Wass MN, Sternberg MJE.** 2015. The Phyre2 web  
809 portal for protein modeling, prediction and analysis. *Nat Protoc* **10**:845–858.
- 810 64. **Bouvet M, Lugari A, Posthuma CC, Zevenhoven JC, Bernard S, Betzi S, Imbert I,**  
811 **Canard B, Guillemot J-C, Lécine P, Pfefferle S, Drosten C, Snijder EJ, Decroly E,**  
812 **Morelli X.** 2014. Coronavirus Nsp10, a critical co-factor for activation of multiple  
813 replicative enzymes. *J Biol Chem* **289**:25783–25796.
- 814 65. **Donaldson EF, Sims AC, Graham RL, Denison MR, Baric RS.** 2007. Murine hepatitis

- 815 virus replicase protein nsp10 is a critical regulator of viral RNA synthesis. *J Virol*  
816 **81**:6356–6368.
- 817 66. **Crotty S, Cameron C, Andino R.** 2002. Ribavirin's antiviral mechanism of action: lethal  
818 mutagenesis? *J Mol Med* **80**:86–95.
- 819 67. **Pathak VK, Temin HM.** 1992. 5-Azacytidine and RNA secondary structure increase the  
820 retrovirus mutation rate. *J Virol* **66**:3093–3100.
- 821 68. **Carroll SS, Tomassini JE, Bosserman M, Getty K, Stahlhut MW, Eldrup AB, Bhat B,**  
822 **Hall D, Simcoe AL, LaFemina R, Rutkowski CA, Wolanski B, Yang Z, Migliaccio G,**  
823 **De Francesco R, Kuo LC, MacCoss M, Olsen DB.** 2003. Inhibition of hepatitis C virus  
824 RNA replication by 2'-modified nucleoside analogs. *J Biol Chem* **278**:11979–11984.
- 825 69. **Lauber C, Goeman JJ, del Carmen Parquet M, Nga PT, Snijder EJ, Morita K,**  
826 **Gorbalenya AE.** 2013. The Footprint of Genome Architecture in the Largest Genome  
827 Expansion in RNA Viruses. *PLoS Pathog* **9**:e1003500.
- 828 70. **Derbyshire V, Grindley ND, Joyce CM.** 1991. The 3'–5' exonuclease of DNA  
829 polymerase I of *Escherichia coli*: contribution of each amino acid at the active site to the  
830 reaction. *EMBO J* **10**:17–24.
- 831 71. **Becares M, Pascual-Iglesias A, Nogales A, Sola I, Enjuanes L, Zuñiga S.** 2016.  
832 Mutagenesis of Coronavirus nsp14 Reveals Its Potential Role in Modulation of the Innate  
833 Immune Response. *J Virol* **90**:5399–5414.
- 834 72. **Cameron CE, Moustafa IM, Arnold JJ.** 2016. Fidelity of Nucleotide Incorporation by

- 835 the RNA-Dependent RNA Polymerase from Poliovirus DNA Replication Across Taxa, 1st  
836 ed. Elsevier Inc.
- 837 73. **Zeng J, Wang H, Xie X, Yang D, Zhou G, Yu L.** 2013. An increased replication fidelity  
838 mutant of foot-and-mouth disease virus retains fitness in vitro and virulence in vivo.  
839 *Antiviral Res* **100**:1–7.
- 840 74. **Subissi L, Posthuma CC, Collet A, Zevenhoven-Dobbe JC, Gorbalenya AE, Decroly**  
841 **E, Snijder EJ, Canard B, Imbert I.** 2014. One severe acute respiratory syndrome  
842 coronavirus protein complex integrates processive RNA polymerase and exonuclease  
843 activities. *Proc Natl Acad Sci USA* **111**:E3900–9.
- 844 75. **Imbert I, Guillemot J-C, Bourhis J-M, Bussetta C, Coutard B, Egloff M-P, Ferron F,**  
845 **Gorbalenya AE, Canard B.** 2006. A second, non-canonical RNA-dependent RNA  
846 polymerase in SARS coronavirus. *EMBO J* **25**:4933–4942.
- 847 76. **Adedeji AO, Marchand B, Velthuis te AJW, Snijder EJ, Weiss S, Eoff RL, Singh K,**  
848 **Sarafianos SG.** 2012. Mechanism of Nucleic Acid Unwinding by SARS-CoV Helicase.  
849 *PLoS ONE* **7**:e36521.
- 850 77. **Chaudhuri M, Chaudhuri M, Song L, Parris DS.** 2003. The herpes simplex virus type  
851 1 DNA polymerase processivity factor increases fidelity without altering pre-steady-state  
852 rate constants for polymerization or excision. *J Biol Chem* **278**:8996–9004.
- 853 78. **Gu S, Li W, Zhang H, Fleming J, Yang W, Wang S, Wei W, Zhou J, Zhu G, Deng J,**  
854 **Hou J, Zhou Y, Lin S, Zhang X-E, Bi L.** 2016. The  $\beta 2$  clamp in the Mycobacterium  
855 tuberculosis DNA polymerase III  $\alpha\beta 2\epsilon$  replicase promotes polymerization and reduces

856 exonuclease activity. *Sci Rep* **6**:18418.

857 79. **Stapleford KA, Rozen-Gagnon K, Das PK, Saul S, Poirier EZ, Blanc H, Vidalain P-O,**  
858 **Merits A, Vignuzzi M.** 2015. Viral Polymerase-Helicase Complexes Regulate  
859 Replication Fidelity To Overcome Intracellular Nucleotide Depletion. *J Virol* **89**:11233–  
860 11244.

861 80. **Agudo R, la Higuera de I, Arias A, Grande-Pérez A, Domingo E.** 2016. Involvement  
862 of a joker mutation in a polymerase-independent lethal mutagenesis escape mechanism.  
863 *Virology* **494**:257–266.

864 81. **Egloff M-P, Ferron F, Campanacci V, Longhi S, Rancurel C, Dutartre H, Snijder EJ,**  
865 **Gorbalenya AE, Cambillau C, Canard B.** 2004. The severe acute respiratory syndrome-  
866 coronavirus replicative protein nsp9 is a single-stranded RNA-binding subunit unique in  
867 the RNA virus world. *Proc Natl Acad Sci USA* **101**:3792–3796.

868 82. **Bhardwaj K, Guarino L, Kao CC.** 2004. The severe acute respiratory syndrome  
869 coronavirus Nsp15 protein is an endoribonuclease that prefers manganese as a cofactor. *J*  
870 *Virol* **78**:12218–12224.

871 83. **Sanjuán R, Cuevas JM, Furió V, Holmes EC, Moya A.** 2007. Selection for Robustness  
872 in Mutagenized RNA Viruses. *PLOS Genet* **3**:e93.

873 84. **Goldhill D, Lee A, Williams ESCP, Turner PE.** 2014. Evolvability and robustness in  
874 populations of RNA virus  $\Phi 6$ . *Frontiers in Microbiology* **5**.

875 85. **Montville R, Froissart R, Remold SK, Tenailon O, Turner PE.** 2005. Evolution of

- 876 mutational robustness in an RNA virus. *PLoS Biol* **3**:e381.
- 877 86. **Graci JD, Gnädig NF, Galarraga JE, Castro C, Vignuzzi M, Cameron CE.** 2012.  
878 Mutational robustness of an RNA virus influences sensitivity to lethal mutagenesis. *J*  
879 *Viro* **86**:2869–2873.
- 880 87. **Lauring AS, Acevedo A, Cooper SB, Andino R.** 2012. Codon usage determines the  
881 mutational robustness, evolutionary capacity, and virulence of an RNA virus. *Cell Host*  
882 *and Microbe* **12**:623–632.
- 883 88. **Lauring AS, Frydman J, Andino R.** 2013. The role of mutational robustness in RNA  
884 virus evolution. *Nat Rev Microbiol* **11**:327–336.
- 885 89. **Aguilera ER, Erickson AK, Jesudhasan PR, Robinson CM, Pfeiffer JK.** 2017. Plaques  
886 Formed by Mutagenized Viral Populations Have Elevated Coinfection Frequencies. *MBio*  
887 **8**:e02020–16–12.
- 888 90. **O'Dea EB, Keller TE, Wilke CO.** 2010. Does Mutational Robustness Inhibit Extinction  
889 by Lethal Mutagenesis in Viral Populations? *PLoS Comput Biol* **6**:e1000811–12.
- 890 91. **Yount B, Denison MR, Weiss SR, Baric RS.** 2002. Systematic assembly of a full-length  
891 infectious cDNA of mouse hepatitis virus strain A59. *J Virol* **76**:11065–11078.

892

## FIGURE 1

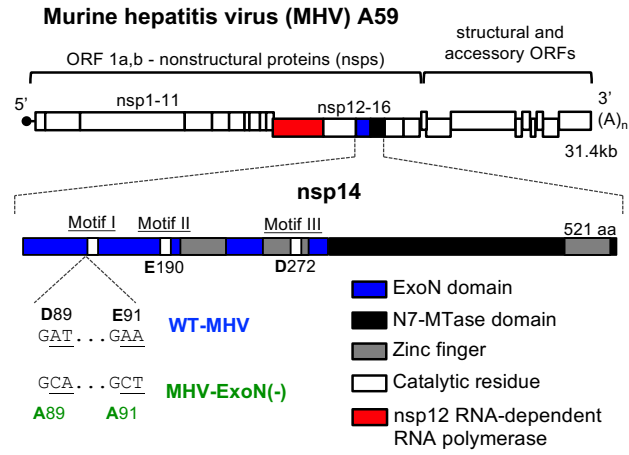

FIGURE 2

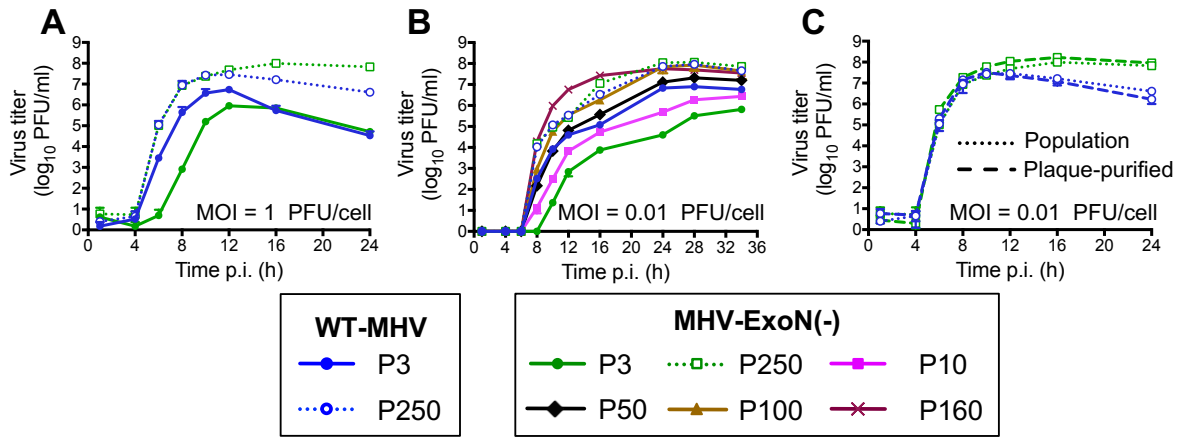

## FIGURE 3

### A WT-ExoN(+) P250

#### ORF1a

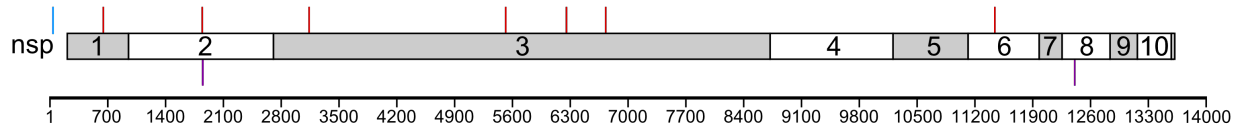

#### ORF1b

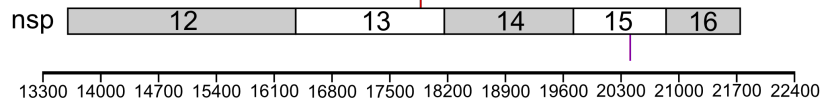

#### Structural and accessory ORFs

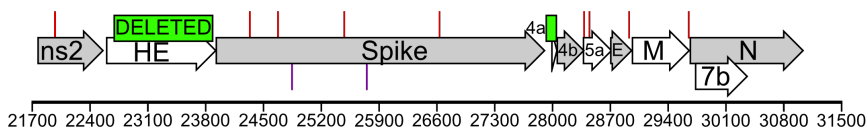

Total mutations: 23  
 Nonsynonymous: 17  
 Synonymous: 5  
 Noncoding: 1

### B MHV-ExoN(-) P250

#### ORF1a

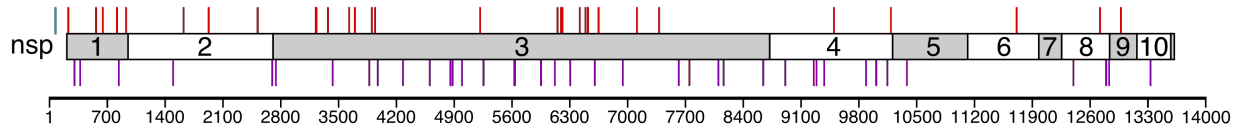

#### ORF1b

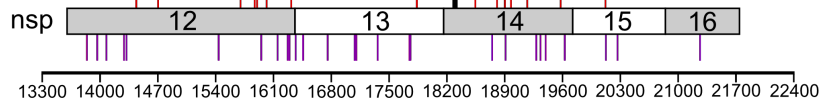

#### Structural and accessory ORFs

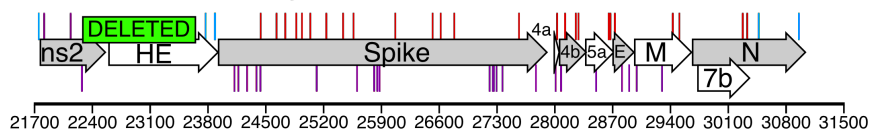

Total mutations: 171  
 Nonsynonymous: 74  
 Synonymous: 93  
 Noncoding: 4



FIGURE 4

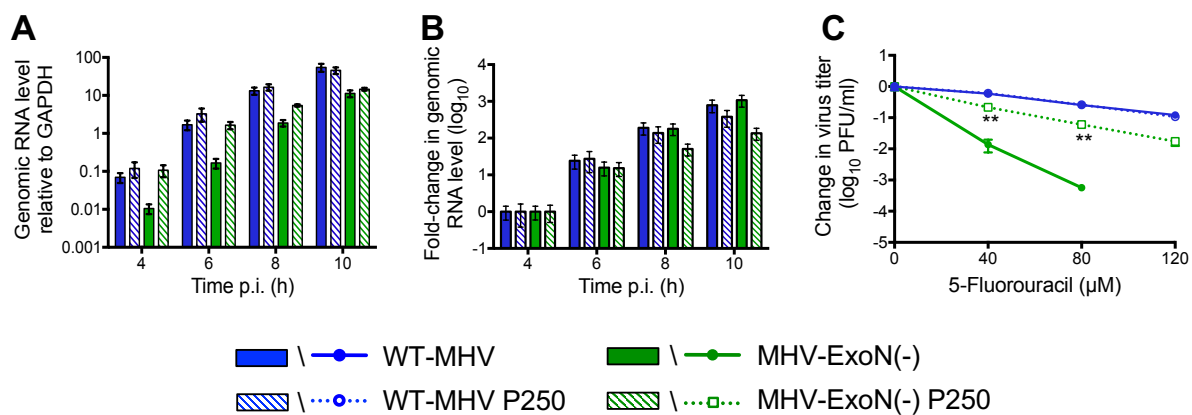

## FIGURE 5

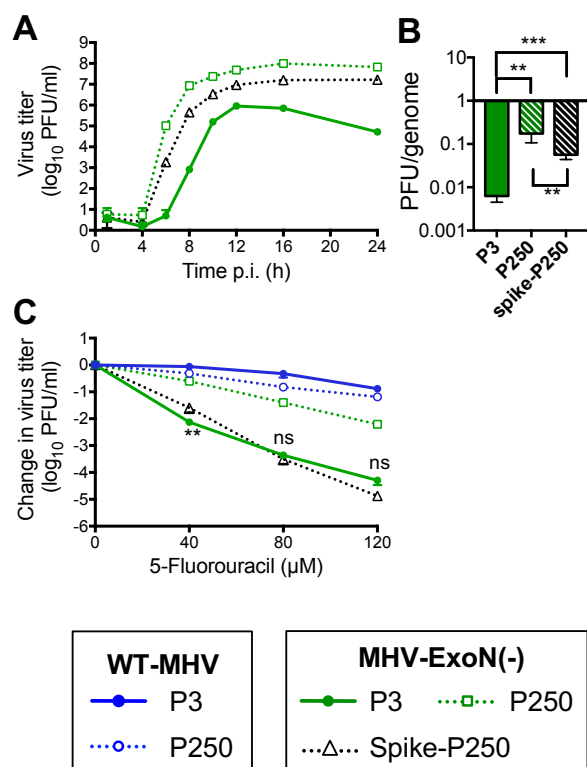

FIGURE 6

**A nsp12-RdRp: 7 total nonsynonymous mutations**

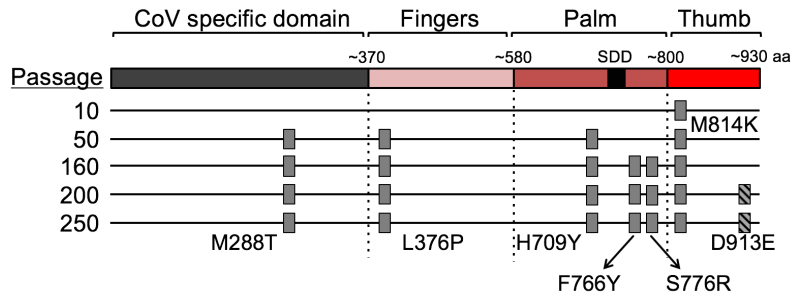

NB: No new NS changes at P31, P72, P90, P100, P120, P140, P180, P220, or P240.

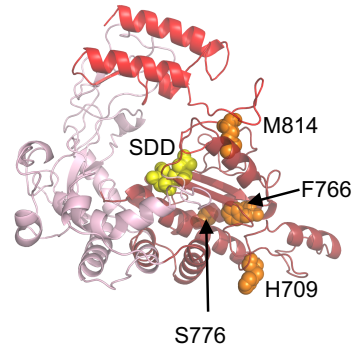

Not shown: M288, L376, D913

**B nsp14: 6 total nonsynonymous mutations**

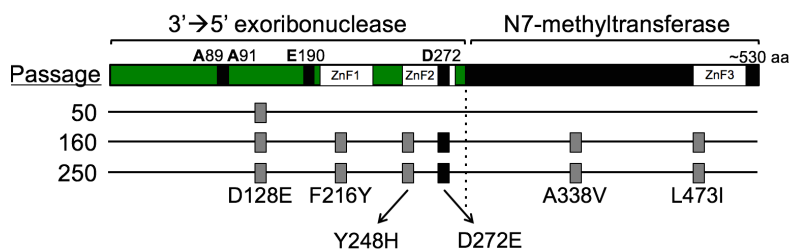

NB: No new NS changes at P10, P31, P72, P90, P100, P120, P140, P180, P200, P220, or P240.

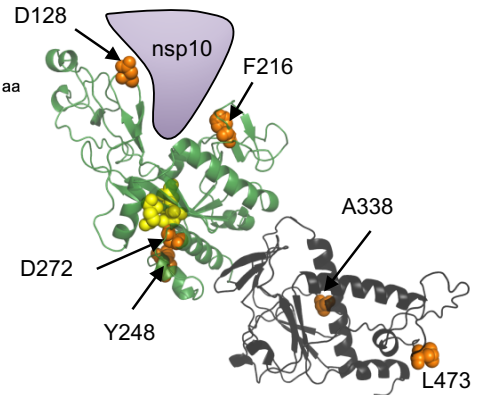

FIGURE 7

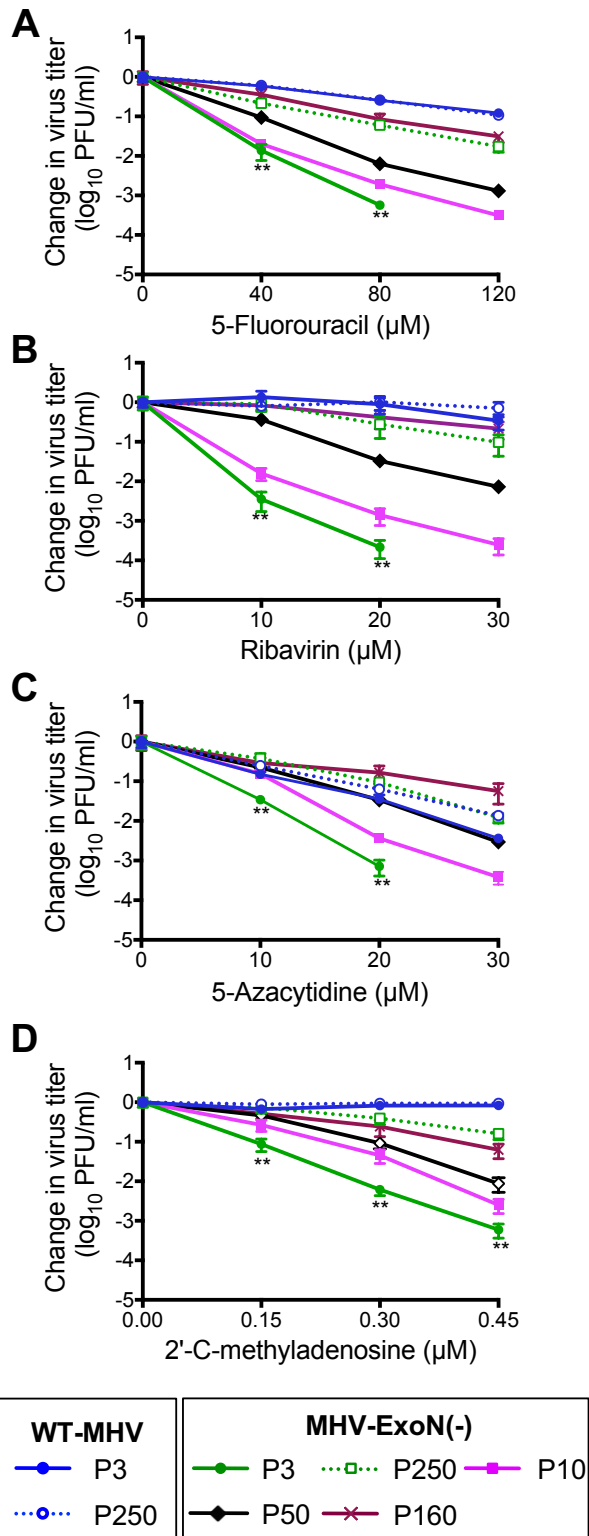

## FIGURE 8

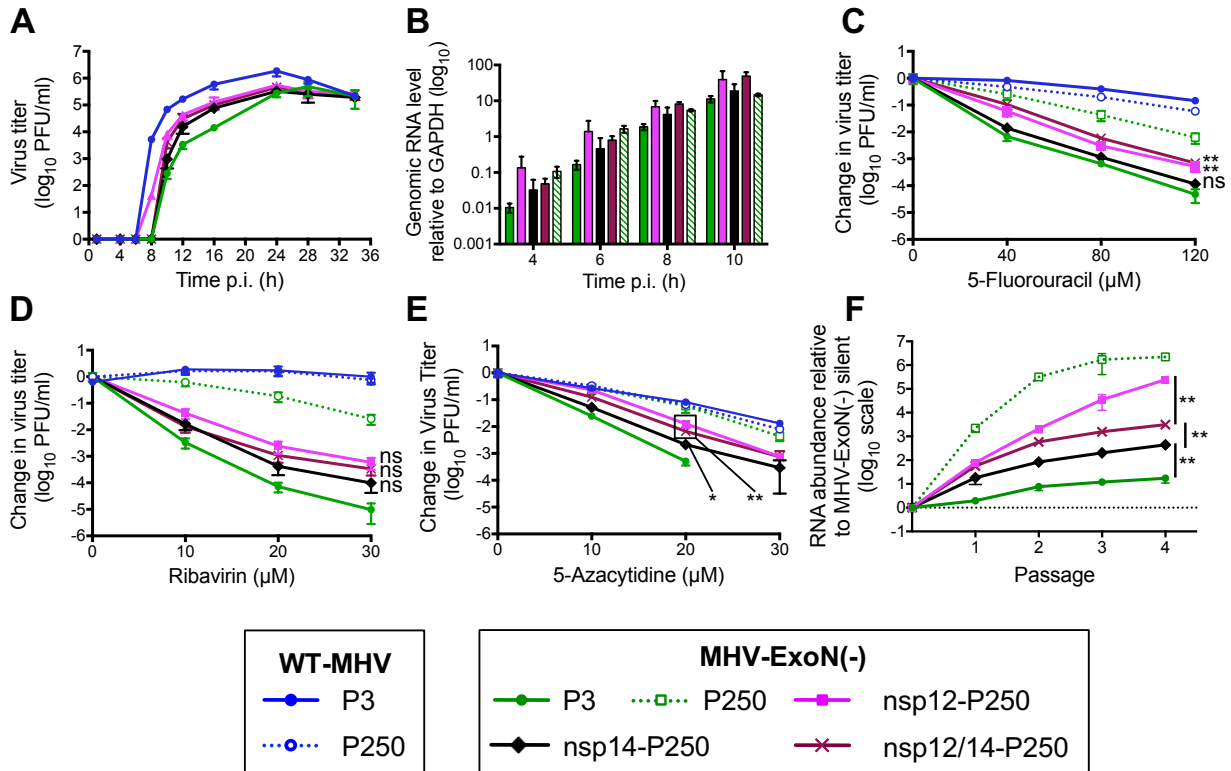

Source: http://biorxiv.org/content/10.1101/175562v1.full.pdf
